# Supplementary material
Source: PubMed Central journal article supplement (PMC6792376)
Supplement: ehp-127-067001-s002.pdf [file ehp-127-067001-s002.pdf]

**Note to readers with disabilities:** *EHP* strives to ensure that all journal content is accessible to all readers. However, some figures and Supplemental Material published in *EHP* articles may not conform to [508 standards](#) due to the complexity of the information being presented. If you need assistance accessing journal content, please contact [ehp508@niehs.nih.gov](mailto:ehp508@niehs.nih.gov). Our staff will work with you to assess and meet your accessibility needs within 3 working days.

### **Supplemental Material**

#### **Shedding Some Light in the Dark—A Comparison of Personal Measurements with Satellite-Based Estimates of Exposure to Light at Night among Children in the Netherlands**

Anke Huss, Luuk van Wel, Lily Bogaards, Tanja Vrijkkotte, Luzian Wolf, Gerard Hoek, and Roel Vermeulen

#### **Table of Contents**

**Figure S1.** Example picture of LightWatcher worn during daytime.

**Figure S2.** Scatter plots of VIIRS-DNB light at night levels.

**Figure S3.** Box plots of measured night at light levels (lux) and self-reported bedroom darkness in a subset of children (N=44).

**Figure S4.** Box plots of VIIRS-DNB LAN levels across quartiles of average daily screen time and frequency of electronic device use in the hour before going to bed.

**Table S1.** Characteristics of subset of ABCD cohort with light measurements, by satellite light at night levels in tertiles.

**Table S2.** Characteristics of the ABCD cohort and the subsets of the study population with light measurements, and with light measurements and self-reports.

**Table S3.** Self-reported bedroom darkness.

**Table S4.** Lux levels of different time frames of evening and night exposure.
